# Supplementary material for: Reading bots: The implication of deep learning on guided reading
Source: Frontiers journal article supplement (doi:10.3389/fpsyg.2023.980523), 2023-02-06
Supplement: Data_Sheet_1.ZIP [file Data_Sheet_1.ZIP]

# Transformation Patterns

May 2019

## 1 Clausal Disembedding

### 1.1 Coordinate Clauses

| RULE                                                                                                                                                                                                                                         | TREGEX PATTERN                                                          | EXTRACTED SENTENCE                                |
|----------------------------------------------------------------------------------------------------------------------------------------------------------------------------------------------------------------------------------------------|-------------------------------------------------------------------------|---------------------------------------------------|
| CoordinationExtractor                                                                                                                                                                                                                        | ROOT <<: (S < (S \$. <span style="border: 1px solid black;">S</span> )) | <span style="border: 1px solid black;">S</span> . |
| EXAMPLE: The Assistant Attorney in Orlando investigated the modeling company, <i>and decided that they were not doing anything wrong, and after Pearlman's bankruptcy, the company emerged unscathed and was sold to a Canadian company.</i> |                                                                         |                                                   |

Table 1: The transformation rule pattern for splitting coordinate clauses. The framed pattern represents the part of a sentence that is extracted from the source and turned into a stand-alone sentence.

### 1.2 Adverbial Clauses

### 1.3 Relative Clauses

### 1.4 Reported Speech

## 2 Phrasal Disembedding

### 2.1 Coordinate Verb Phrases

### 2.2 Coordinate Noun Phrases

### 2.3 Appositions

### 2.4 Prepositional Phrases

### 2.5 Adjectival and Adverbial Phrases

### 2.6 Lead Noun Phrases

| RULE                                                                                                                                                                                                                                       | TREGEX PATTERN                                                                    | EXTRACTED SENTENCE                           |
|--------------------------------------------------------------------------------------------------------------------------------------------------------------------------------------------------------------------------------------------|-----------------------------------------------------------------------------------|----------------------------------------------|
| Subordination-PostExtractor                                                                                                                                                                                                                | ROOT <<: (S < (NP \$.. (VP < +(VP) ( <b>SBAR</b> < (S < (NP \$.. VP))))))         | S < (NP \$.. VP) .                           |
| EXAMPLE: It is also used by those who commute into the city using Metrorail, <i>as the two systems are connected at the Government Center and Brickell stations.</i>                                                                       |                                                                                   |                                              |
| Subordination-PreExtractor                                                                                                                                                                                                                 | ROOT <<: (S < ( <b>SBAR</b> < (S < (NP \$.. VP)) \$.. (NP \$.. VP)))              | S < (NP \$.. VP) .                           |
| EXAMPLE: <i>Though shorts are an option for many casual occasions,</i> they may also be inappropriate for more formal occasions, and a skirt or dress, such as a sundress, may be the best choice.                                         |                                                                                   |                                              |
| PurposePost-Extractor                                                                                                                                                                                                                      | ROOT <<: (S < (NP \$.. (VP < +(VP) (NP PP \$.. (S <<, (VP <<, /(T t)o/) )))))     | <u>This</u> + BE + S <<, (VP <<, /(T t)o/) . |
| EXAMPLE: In 1923 he joined Ireland's new Department of External Affairs and was sent to Geneva in 1929 <i>to act as Ireland's representative to the League of Nations.</i>                                                                 |                                                                                   |                                              |
| PurposePre-Extractor                                                                                                                                                                                                                       | ROOT <<: (S < (S <<, (VP <<, /(T t)o/) \$.. (NP \$.. VP)))                        | <u>This</u> + BE + S <<, (VP <<, /(T t)o/) . |
| EXAMPLE: <i>To support this claim,</i> he points out the actor is wearing a very large fake moustache and a hat, and when his moustache detached before the end of the film, he hid his face by an arm until the moustache was reattached. |                                                                                   |                                              |
| Subordination-PostPurpose-Extractor                                                                                                                                                                                                        | ROOT <<: (S < (NP \$.. (VP < +(VP) ( <b>SBAR</b> < (S <<, (VP <<, /(T t)o/) ))))) | <u>This</u> + BE + S <<, (VP <<, /(T t)o/) . |
| EXAMPLE: A graduate student, Ian Gray, is researching the evolution of human eyes with Karen and Kenny, <i>in order to discredit creationists by proving that eyes have evolved.</i>                                                       |                                                                                   |                                              |
| Subordination-PrePurpose-Extractor                                                                                                                                                                                                         | ROOT <<: (S < ( <b>SBAR</b> < (S <<, (VP <<, /(T t)o/) ) \$.. (NP \$.. VP)))      | <u>This</u> + BE + S <<, (VP <<, /(T t)o/) . |
| EXAMPLE: <i>In order to cater for large items and fast loading,</i> the entire tail section was hinged, and could be opened using hydraulic actuators.                                                                                     |                                                                                   |                                              |

Table 2: A selection of transformation rule patterns. A framed pattern represents the extracted part of a sentence. An underlined pattern refers to its referent. A pattern in bold will be excluded in the remaining sentence.

| RULE                                                                                                                                                                                       | TREGEX PATTERN                                                                                                                                                                            | EXTRACTED SENTENCE                           |
|--------------------------------------------------------------------------------------------------------------------------------------------------------------------------------------------|-------------------------------------------------------------------------------------------------------------------------------------------------------------------------------------------|----------------------------------------------|
| Non-Restrictive-Relative-ClausePrep-WhichWho-Extractor                                                                                                                                     | ROOT <<: (S << (NP <, <u>NP</u> & < (/,/ \$+ ( <b>SBAR</b> <, ( <b>WHPP</b> \$+ <span style="border: 1px solid black;">S &amp; &lt;, IN=in &amp; &lt; - WHNP=whnp</span> ) & ?\$+ /,/)))) | <i>in + attachment phrase + whnp.</i>        |
| EXAMPLE: His family had been exiled to, and enrolled into <u>Harvard University</u> , <i>at which he studied archaeology.</i>                                                              |                                                                                                                                                                                           |                                              |
| Non-Restrictive-Relative-ClauseWhere-Extractor                                                                                                                                             | ROOT <<: (S << (/.* / < (NP PP \$+ (/,/ \$+ ( <b>SBAR</b> <, ( <b>WHADVP</b> \$+ <span style="border: 1px solid black;">S &amp; &lt;&lt;: WRB</span> ) & ?\$+ /,/))))                     | <i>Extraction.</i>                           |
| EXAMPLE: The noted communist, Sakhavu Kurumpakara Thankappan, was born and raised in Kurumpakara, <i>where a memorial dedicated to him is situated at the Udayanmuttam Junction.</i>       |                                                                                                                                                                                           |                                              |
| Non-Restrictive-Relative-ClauseWhom-Extractor                                                                                                                                              | ROOT <<: (S << (NP <, <u>NP</u> & < (/,/ \$+ ( <b>SBAR</b> <, ( <b>WHNP</b> \$+ (S <, NP & < - (VP ? < + (VP) PP=pp)) & <<: ( <b>WP</b> <: whom)) & ?\$+ /,/))))                          | <i>np + vp + attachment phrase + pp.</i>     |
| EXAMPLE: He is best known for his work with The Byrds, <i>whom he joined in September 1968 as a replacement for the band's original bass player Chris Hillman.</i>                         |                                                                                                                                                                                           |                                              |
| Non-Restrictive-Relative-ClauseWhose-Extractor                                                                                                                                             | ROOT <<: (S << (NP <, <u>NP</u> \$+ (/,/ \$+ ( <b>SBAR</b> <, ( <b>WHNP</b> \$+ <span style="border: 1px solid black;">S &amp; &lt;, (/WP \\\$/ \$+ /.* /))</span> & ?\$+ /,/))))         | <i>Attachment phrase + "s" + extraction.</i> |
| EXAMPLE: Lacking a close relationship with his own estranged daughter, Dunn comes to establish a strong bond with <u>Maggie</u> , <i>whose own family cares little for her well-being.</i> |                                                                                                                                                                                           |                                              |
| Non-Restrictive-Relative-Clause-WhoWhich-Extractor                                                                                                                                         | ROOT <<: (S << (NP <, <u>NP</u> & < (/,/ \$+ ( <b>SBAR</b> <, ( <b>WHNP</b> \$+ <span style="border: 1px solid black;">S &amp; &lt;&lt;: WP WDT</span> ) & ?\$+ /,/))))                   | <i>Attachment phrase + extraction.</i>       |
| EXAMPLE: However, while there, she discovered she could live on her income as a novelist and also met <u>her husband</u> , <i>who was completing his doctorate in physics.</i>             |                                                                                                                                                                                           |                                              |

Table 3: A selection of transformation rule patterns. A framed pattern represents the extracted part of a sentence. An underlined pattern refers to its referent. A pattern in bold will be excluded in the remaining sentence.

| RULE                                                                                                                                                                                                                                                 | TREGEX PATTERN                                                                                                                                                              | EXTRACTED SENTENCE                                          |
|------------------------------------------------------------------------------------------------------------------------------------------------------------------------------------------------------------------------------------------------------|-----------------------------------------------------------------------------------------------------------------------------------------------------------------------------|-------------------------------------------------------------|
| Participial-Middle-Extractor                                                                                                                                                                                                                         | ROOT <<: (S < (VP< +(VP) /VB.*/) & << (NP PP <, (NP ?\$+ PP & \$ + + (/,/ \$+ (VP [ <u>&lt;</u> , (ADVP PP \$+ VBG VBN)   <, VBG VBN] & ?\$+ /,/))))))                      | <i>Attachment phrase</i> + BE + <i>extraction.</i>          |
| EXAMPLE: <u>The Metox</u> , <i>named after its manufacturer</i> , was a high frequency very sensitive radar receiver manufactured by a small French company in occupied Paris, which could detect ASV transmissions from patrolling Allied aircraft. |                                                                                                                                                                             |                                                             |
| Shared-NPPost-Participial-Extractor                                                                                                                                                                                                                  | String participalNode = "(== S=s   == (PP ADVP < +(PP ADVP) S=s)) : (=s <: (VP <<, VBG VBN))";<br>ROOT <<: (S < (NP \$.. (VP < +(VP) (NP PP \$.. " + participalNode + ")))) | <i>Attachment phrase</i> + (HAVE) + BE + <i>extraction.</i> |
| EXAMPLE: <u>He</u> served as chief judge from 1987 to 1994, <i>assuming senior status on November 2, 1995.</i>                                                                                                                                       |                                                                                                                                                                             |                                                             |
| Shared-NPPre-Participial-Extractor                                                                                                                                                                                                                   | String participalNode = "(==node [== S=s   == (PP ADVP < +(PP ADVP) S=s)) : (=s <: (VP <<, VBG VBN))";<br>ROOT <<: (S < " + participalNode + ") : (=node \$.. (NP \$.. VP)) | <i>Attachment phrase</i> + (HAVE) + BE + <i>extraction.</i> |
| EXAMPLE: <i>Founded in 1973</i> , <u>the campus</u> is situated on a hillside below the neighborhood.                                                                                                                                                |                                                                                                                                                                             |                                                             |

Table 4: A selection of transformation rule patterns. A framed pattern represents the extracted part of a sentence. An underlined pattern refers to its referent. A pattern in bold will be excluded in the remaining sentence.

| RULE                                                           | TREGEX PATTERN                                                                                                                                                                                           | EXTRACTED SENTENCE                           |
|----------------------------------------------------------------|----------------------------------------------------------------------------------------------------------------------------------------------------------------------------------------------------------|----------------------------------------------|
| Restrictive-Relative-ClauseWhom-Extractor                      | ROOT <<: (S << (NP <, NP & < ( <b>SBAR</b> <, ( <b>WHNP</b> \$+ (S <, NP=np & < - (VP=vp ? < +(VP) PP=pp)) & <<: (WP <: whom))))))                                                                       | <i>np + vp + attachment phrase + pp.</i>     |
| EXAMPLE:                                                       |                                                                                                                                                                                                          |                                              |
| Restrictive-Relative-ClauseWhose-Extractor                     | ROOT <<: (S << (NP < ( <u>NP</u> \$+ ( <b>SBAR</b> <, ( <b>WHNP</b> \$+ S & <, (/ WP\\\$/ \$+ /.*/))))))                                                                                                 | <i>Attachment phrase + "s" + extraction.</i> |
| EXAMPLE:                                                       | The rescue operation to reach Flight 608 was carried out by the Canadian Forces <i>whose plane spotted the downed aircraft and parachuted in nine search-rescue workers.</i>                             |                                              |
| Restrictive-Relative-Clause-WhoWhich-Extractor                 | ROOT <<: (S << (NP <, ( <u>NP</u> \$+ + ( <b>SBAR</b> <, ( <b>WHNP</b> \$+ S & <<: WP WDT) & ?\$+ /,/))))                                                                                                | <i>Attachment phrase + extraction.</i>       |
| EXAMPLE:                                                       | Ishak Belfodil is a <u>Franco-Algerian football player</u> <i>who currently plays for French club Olympique Lyonnais in Ligue 1.</i>                                                                     |                                              |
| Restrictive-Relative-Clause-Without-Relative-Pronoun-Extractor | ROOT <<: (S << (NP <, ( <u>NP</u> \$+ + ( <b>SBAR</b> <: (S < (VP ? < (PP ? <: IN))))))                                                                                                                  | <i>Attachment phrase + extraction.</i>       |
| EXAMPLE:                                                       | In 1894 Verga moved back to <u>the house</u> <i>he was born in</i> , where he died of a cerebral thrombosis in 1922.                                                                                     |                                              |
| Restrictive-Participial-Extractor                              | ROOT <<: (S < (VP < +(VP) /.*/=mainverb) & << (NP PP <, ( <u>NP</u> \$+ (VP [<, ( <b>ADVP</b>   <b>PP</b> \$+ <b>VBG</b>   <b>VBN</b> )   <, <b>VBG</b>   <b>VBN</b> ] )) & [> (PP ! > S)  > (VP > S)])) | <i>Attachment phrase + BE + extraction.</i>  |
| EXAMPLE:                                                       | The Muppets at Walt Disney World is a <u>film</u> <i>starring Jim Henson's Muppets at Walt Disney World</i> , and this was the last Muppets project that Jim Henson worked on before his death in 1990.  |                                              |

Table 5: A selection of transformation rule patterns. A framed pattern represents the extracted part of a sentence. An underlined pattern refers to its referent. A pattern in bold will be excluded in the remaining sentence.

| RULE                                                                                                                         | TREGEX PATTERN                                                                                                                                                                                    | EXTRACTED SENTENCE                  |
|------------------------------------------------------------------------------------------------------------------------------|---------------------------------------------------------------------------------------------------------------------------------------------------------------------------------------------------|-------------------------------------|
| PreAttribution-Extractor                                                                                                     | ROOT <<: (S < (S SBAR SBARQ \$.. (NP=np [ \$., VP=vp   \$.. VP=vp] )));<br><i>vb</i> is an attribution-verb;<br>Extraction ← <b>text until <i>np</i> and text after <i>vp</i></b>                 | <i>This + BE + what extraction.</i> |
| EXAMPLE: Witness memories don't get better with time, <i>she said in an interview with the International Herald Tribune.</i> |                                                                                                                                                                                                   |                                     |
| Quoted-Attribution-PostExtractor                                                                                             | ROOT <<: (S < (NP \$.. (VP < +(VP) (SBAR [, /"/=start   <<, /"/=start] [.. /"/=end   << - /"/=end] ))));<br>Extraction ← <b>text until <i>start</i> and text after <i>end</i></b>                 | <i>This + BE + what extraction.</i> |
| EXAMPLE: <i>Pauli remarked sadly</i> "It is not even wrong".                                                                 |                                                                                                                                                                                                   |                                     |
| Quoted-Attribution-PreExtractor                                                                                              | ROOT <<: (S < (S SBAR SBARQ [, /"/=start   <<, /"/=start] [.. /"/=end   << - /"/=end] \$.. (NP [ \$., VP   \$.. VP] )));<br>Extraction ← <b>text until <i>start</i> and text after <i>end</i></b> | <i>This + BE + what extraction.</i> |
| EXAMPLE:                                                                                                                     |                                                                                                                                                                                                   |                                     |
| Subordination-PostAttribution-Extractor                                                                                      | ROOT <<: (S < (NP \$.. (VP=vp < +(VP) (SBAR=sbar) ));<br><i>vb</i> is an attribution-verb;<br>Extraction ← <b>text until <i>sbar</i> and text after <i>sbar</i></b>                               | <i>This + BE + what extraction.</i> |
| EXAMPLE: <i>Later, Ellis claimed that</i> the character was not in fact based on his father.                                 |                                                                                                                                                                                                   |                                     |

Table 6: A selection of transformation rule patterns. A framed pattern represents the extracted part of a sentence. An underlined pattern refers to its referent. A pattern in bold will be excluded in the remaining sentence.

| RULE                                                                                                                  | TREGEX PATTERN                                                                  | EXTRACTED SENTENCE      |
|-----------------------------------------------------------------------------------------------------------------------|---------------------------------------------------------------------------------|-------------------------|
| SharedNPPost-Coordination-Extractor                                                                                   | ROOT <<: (S < ( <u>NP</u> \$.. (VP < +(VP) ( <u>VP</u> > VP \$.. <u>VP</u> )))) | <u>NP</u> + <u>VP</u> . |
| EXAMPLE: After Pearlman's bankruptcy, <u>the company</u> emerged unscathed <i>and was sold to a Canadian company.</i> |                                                                                 |                         |

Table 7: The transformation rule pattern for disembedding coordinate verb phrases. A framed pattern represents the part of the input that is extracted and rephrased into a self-contained sentence. The underlined pattern refers to its referent.

| RULE                                                                                                                                                                 | TREGEX PATTERN                                                                                           | EXTRACTED SENTENCE |
|----------------------------------------------------------------------------------------------------------------------------------------------------------------------|----------------------------------------------------------------------------------------------------------|--------------------|
| PostListNP-Extractor                                                                                                                                                 | ROOT <<: (S < (NP \$.. (VP << (NP=np1 < (NP \$.. NP=np2))));<br>Extraction ← <b>replace np1 with np2</b> | <i>Extraction.</i> |
| EXAMPLE: Demola Aladekomo is a computer engineer, technology pioneer, entrepreneur and philanthropist.                                                               |                                                                                                          |                    |
| PreListNP-Extractor                                                                                                                                                  | ROOT <<: (S < (NP=np1 < (NP \$.. NP=np2) \$.. VP));<br>Extraction ← <b>replace np1 with np2</b>          | <i>Extraction.</i> |
| EXAMPLE: At the end of the progression, 47 seconds into the song, the intensity of the synthesizer rises before an organ, bass guitar, and piano subsequently enter. |                                                                                                          |                    |

Table 8: A selection of transformation rule patterns. A framed pattern represents the extracted part of a sentence. An underlined pattern refers to its referent. A pattern in bold will be excluded in the remaining sentence.

| RULE                                                                             | TREGEX PATTERN                                                                                                                                     | EXTRACTED SENTENCE                          |
|----------------------------------------------------------------------------------|----------------------------------------------------------------------------------------------------------------------------------------------------|---------------------------------------------|
| Non-Restrictive-Apposition-Extractor                                             | ROOT <<: (S < (VP < +(VP /.* /) & << (NP \$+ (/, / \$+ (NP !\$ CC & ?\$+ /, /))))                                                                  | <i>Attachment phrase + BE + extraction.</i> |
| EXAMPLE: The president of Lithuania, Antanas Smetona, proposes armed resistance. |                                                                                                                                                    |                                             |
| Restrictive-Apposition-Extractor                                                 | ((PRP\\\$DT)\\ s)*(JJ\\ s)*((NN NNS NNP NNPS)\\ s))+((CC\\ s)((PRP\\\$DT)\\ s)*(JJ\\ s)*((NN NNS NNP NNPS)\\ s)) followed by a <b>named entity</b> | <i>Attachment phrase + BE + extraction.</i> |
| EXAMPLE:                                                                         |                                                                                                                                                    |                                             |

Table 9: A selection of transformation rule patterns. A framed pattern represents the extracted part of a sentence. An underlined pattern refers to its referent. A pattern in bold will be excluded in the remaining sentence.

| RULE                                                                                                                                                                                        | TREGEX PATTERN                                              | EXTRACTED SENTENCE             |
|---------------------------------------------------------------------------------------------------------------------------------------------------------------------------------------------|-------------------------------------------------------------|--------------------------------|
| Prepositional-Attachedto-VPExtractor                                                                                                                                                        | ROOT <<: (S < +(S VP) (VP < ( <u>PP</u> \$- NP PP)) & < VP) | <i>This</i> + BE + <u>PP</u> . |
| EXAMPLE:                                                                                                                                                                                    |                                                             |                                |
| Prepositional-Initial-Extractor                                                                                                                                                             | ROOT <<: (S <, ( <u>PP</u> ?\$+ /,/ & \$+ + VP))            | <i>This</i> + BE + <u>PP</u> . |
| EXAMPLE: <i>After his retirement</i> , he took charge as director of the Indian Institute of Science, holding this position from 1915 to 1921.                                              |                                                             |                                |
| Prepositional-MiddleFinal-Extractor                                                                                                                                                         | ROOT <<: (S < VP & << (/,/ \$+ ( <u>PP</u> ?\$+ /,/)))      | <i>This</i> + BE + <u>PP</u> . |
| EXAMPLE: Founded as a Numidian colony in 4th to 5th century BC, it later became a Roman town in the province of Africa, <i>before its eventual abandonment around 9th to 10th century</i> . |                                                             |                                |

Table 10: A selection of transformation rule patterns. A framed pattern represents the extracted part of a sentence. An underlined pattern refers to its referent. A pattern in bold will be excluded in the remaining sentence.

| RULE                                                                                                           | TREGEX PATTERN                                                | EXTRACTED SENTENCE                    |
|----------------------------------------------------------------------------------------------------------------|---------------------------------------------------------------|---------------------------------------|
| Adjectival-Adverbial-Initial-Extractor                                                                         | ROOT <<: (S <, ( <u>ADJP ADVP</u> \$+ (/,/ \$+ + VP)))        | <i>This</i> + BE + <u>ADJP ADVP</u> . |
| EXAMPLE: <i>Meanwhile</i> , unemployment in France threw skilled workers down to the level of the proletariat. |                                                               |                                       |
| Adjectival-Adverbial-Middle-Final-Extractor                                                                    | ROOT <<: (S < VP & << (/,/ \$+ ( <u>ADJP ADVP</u> ?\$+ /,/))) | <i>This</i> + BE + <u>ADJP ADVP</u> . |
| EXAMPLE: Gustafsson lived a normal life until 2004, <i>almost 44 years after the event</i> .                   |                                                               |                                       |

Table 11: A selection of transformation rule patterns. A framed pattern represents the extracted part of a sentence. An underlined pattern refers to its referent. A pattern in bold will be excluded in the remaining sentence.



| RULE                                                                      | TREGEX PATTERN                                          | EXTRACTED SENTENCE             |
|---------------------------------------------------------------------------|---------------------------------------------------------|--------------------------------|
| LeadNPExtractor                                                           | ROOT <<: (S <, ( <b>NP</b> \$+ (/,/ \$+ NP & \$++ VP))) | <i>This</i> + BE + <b>NP</b> . |
| EXAMPLE: <i>Six days later</i> , NATO took over leadership of the effort. |                                                         |                                |

Table 12: The transformation rule pattern for splitting and rephrasing leading noun phrases. A framed pattern represents the part of the input that is extracted and turned into a stand-alone sentence. A pattern in bold will be deleted from the remaining sentence.
