# Supplementary material for: Reading bots: The implication of deep learning on guided reading
Source: Frontiers journal article supplement (doi:10.3389/fpsyg.2023.980523), 2023-02-06
Supplement: Data_Sheet_1.ZIP [file Data_Sheet_1.ZIP]

Christina Niklaus, Matthias Cetto, André Freitas and Siegfried Handschuh

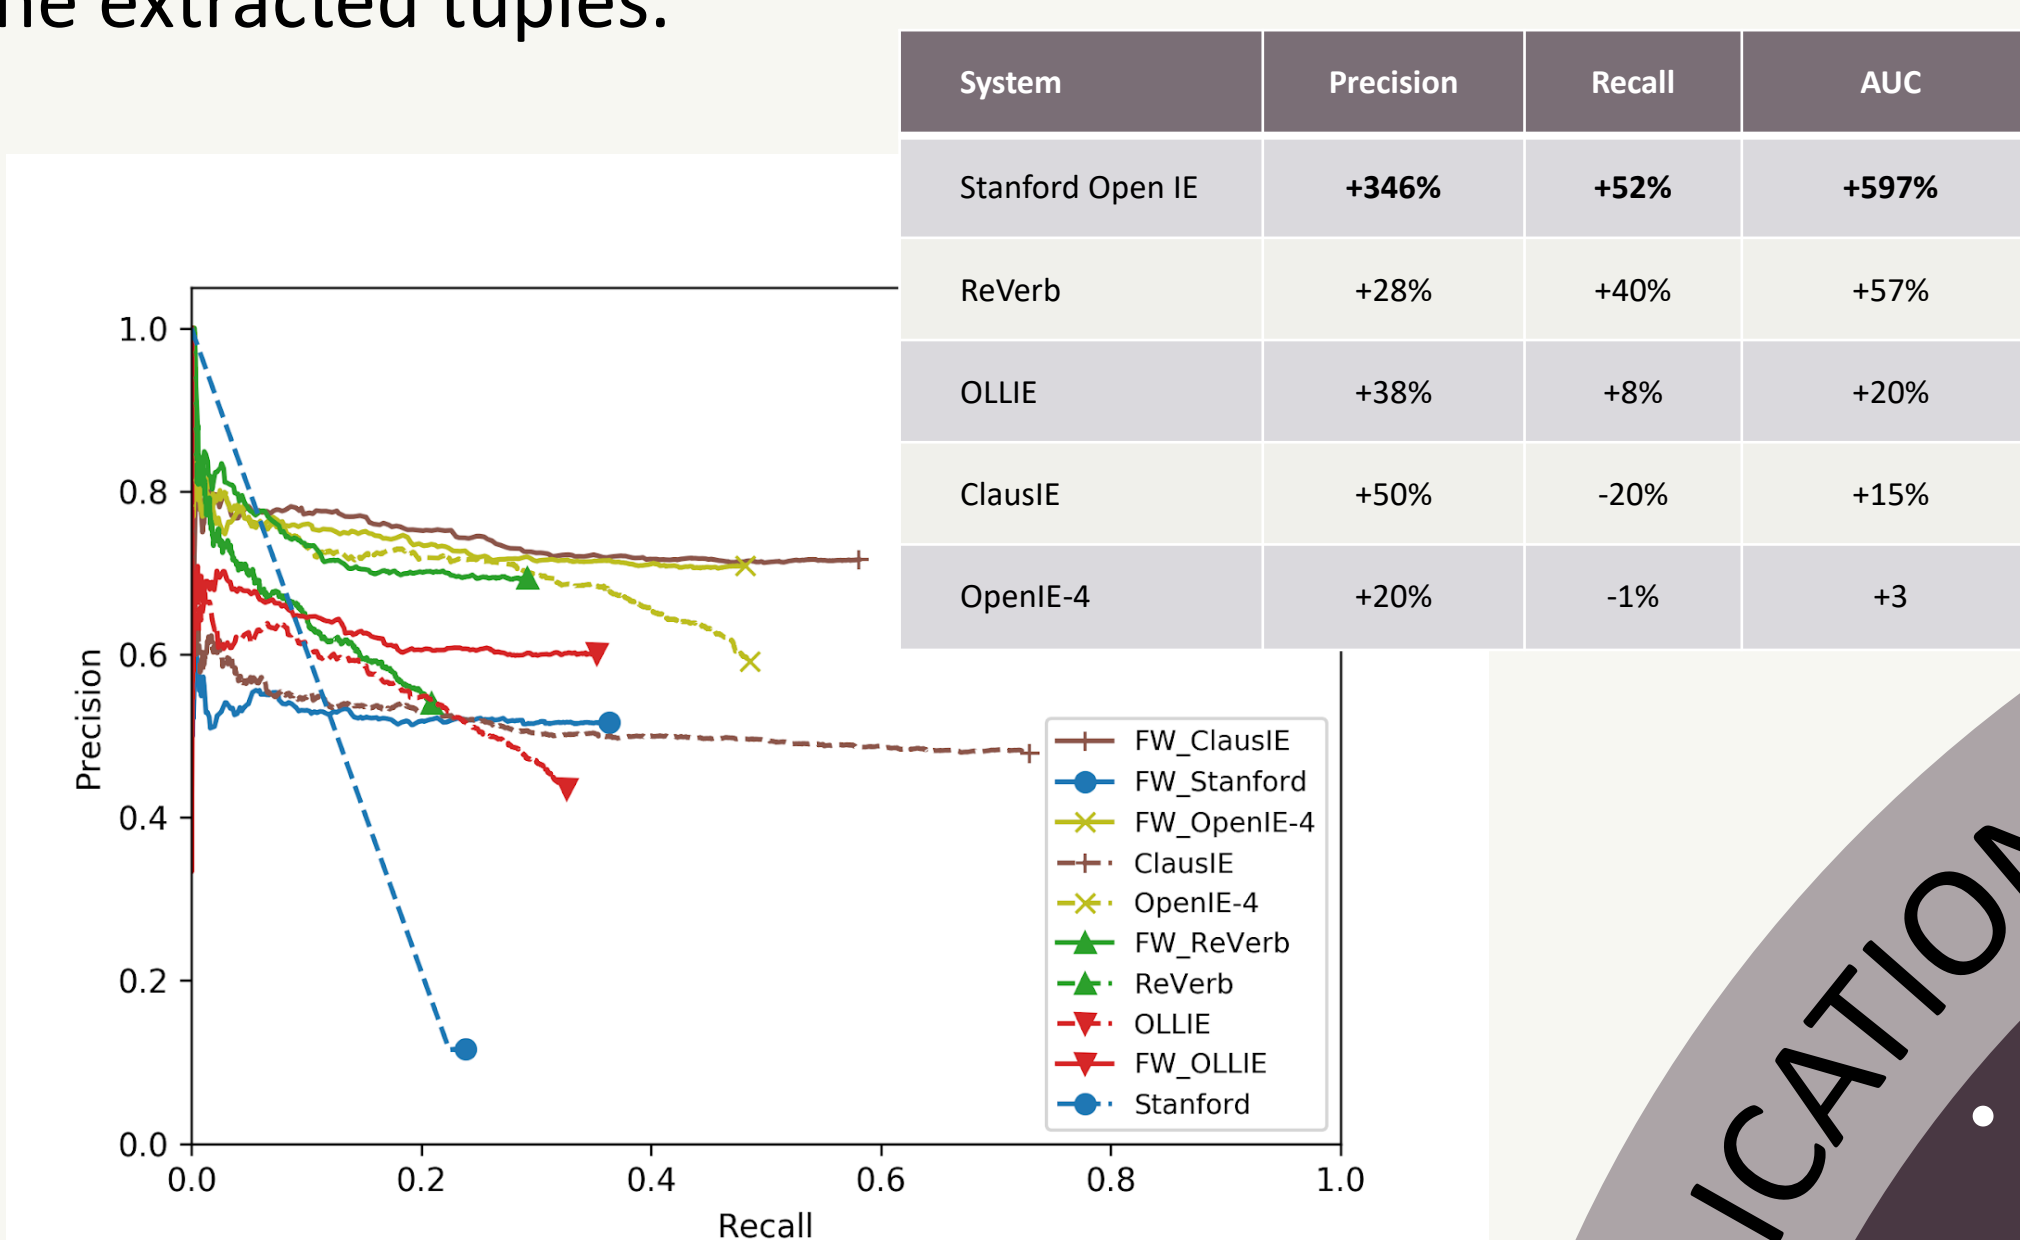

## Open IE

DisSim outperforms the SOTA in structural text simplification:



A comparative analysis with the annotations contained in the **RST Discourse Treebank** [5] demonstrates that



Recursive transformation process:



Each **rule** specifies:



## Split into Minimal Propositions

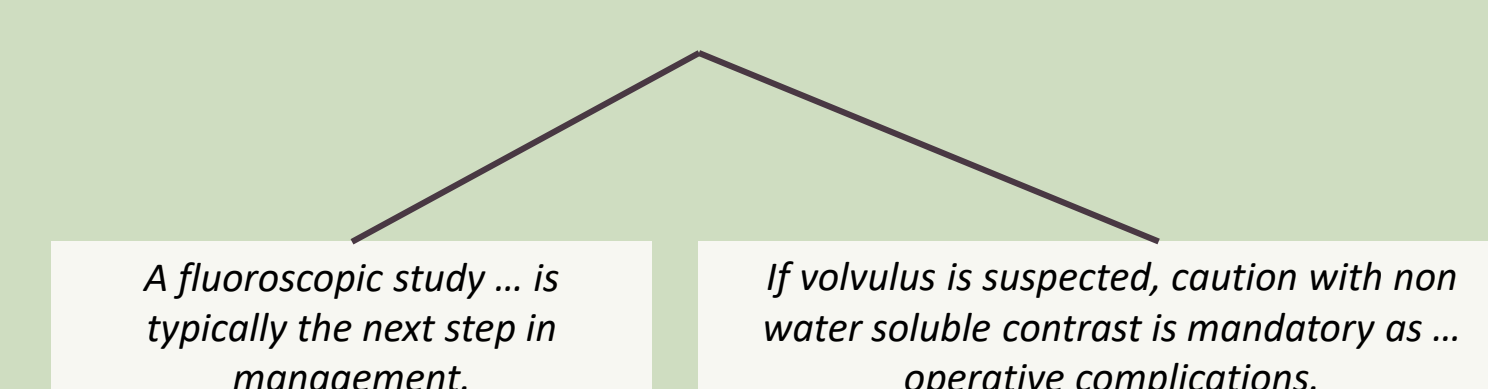

simpler, more **regular structures**

easier to p

loose arrangement of self-contained units that **lack important contextual information**

impedes interpretability

## Establish a Semantic Hierarchy



**hierarchically  
ordered** sentences

**semantically  
interconnected  
sentences**

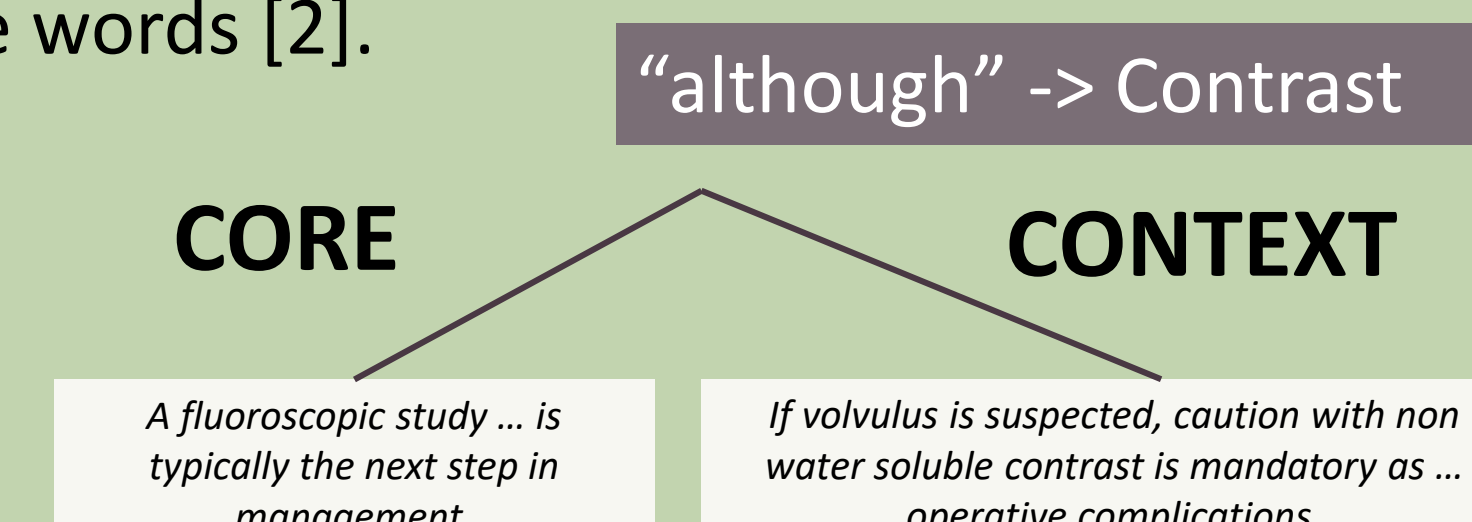

## OUTPUT

**Leaf nodes are recursively simplified** in a top-down fashion until no more rule matches.

**logical structure of**  
utterances that present a  
**simplified syntax**
